# Supplementary material for: Licoflavone A Suppresses Gastric Cancer Growth and Metastasis by Blocking the VEGFR-2 Signaling Pathway
Source: Hindawi journal article supplement (doi:10.1155/2022/5497991), 2022-04-25
Supplement: f1 [file 5497991.f1.docx]

Supplementary Tables 1 List of licoflavone A-related targets

| Compound | Genes names |
| --- | --- |
| Licoflavone A | CREB1, NANH, NANH, TOP1, PTPRS, OPRD1, AKR1B1, ALDH2, CEL, CYP1B1, AKR1B1, PNLIP, ST6GAL1, ST3GAL3, RMLD, ARG1, GUSB, CYP1A1, AMY1A, PTBB , ACP1, FABI, HSD17B3, TNKS, PGF, TRPM7, EEF1A1, EEF1A2, PON1, POL, POLA, XDH, KCND3, ALOX5, TYR, PTPN1, ABCB1, CALM1, ALOX15B, ABCG2, CBS, FABG, ESR2, ALOX12, PPO2, TERT, ABCC1, SIGMAR1, FABZ, TNKS2, ESR1，AKR1B10, ACHE, PTPA, HIF1A, NOX4, ACHE, ST6GAL1, TEM-1, GRK6, GABRA3, BCHE, CTSV, PDE4D, CYP19A1, DPP4, PFMRK, VEGFA, ABCC2, ALOX15, BLAIMP-1, ALOX15, TTR, NAE1, IL2, XDH |

Supplementary Tables 2 List of gastric cancer-related targets

| Diseases | Genes names |
| --- | --- |
| Gastric cancer | ABCB1, ABCC1, ABCC2, ABCG2, ACHE, ACP1, AKR1B1, AKR1B10, ALDH2, ALOX12, ALOX15, ALOX15B, ALOX5, ARG1, BCHE, CALM1, CBS, CEL, CREB1, CYP19A1, CYP1A1, CYP1B1, DPP4, EEF1A1, EEF1A2, ESR1, ESR2, GRK6, GUSB, HIF1A, HSD17B3, IL2, NAE1，NOX4, OPRD1, PDE4D, PGF, PNLIP, PON1, PTPA, PTPN1, PTPRS, ST3GAL3, ST6GAL1, TERT, TNKS, TOP1, TRPM7, TTR, VEGFA, XDH |
